# Supplementary material for: Activation of VCAM-1 and Its Associated Molecule CD44 Leads to Increased Malignant Potential of Breast Cancer Cells
Source: PubMed Central journal article supplement (PMC3975354; doi:10.3390/ijms15033560), 2014-02-27
Supplement: ijms-15-03560-s001.pdf [file ijms-15-03560-s001.pdf]

## Supplementary Information

**Table S1.** Comparison of clinicopathological features in 25 breast cancer patients.

| <b>Characteristic</b>        | <b>Number of patients</b> |
|------------------------------|---------------------------|
| <b>Gender</b>                |                           |
| Female                       | 25                        |
| Male                         | 0                         |
| <b>Age</b>                   |                           |
| <45                          | 7                         |
| 46–60                        | 13                        |
| >61                          | 5                         |
| <b>Stage</b>                 |                           |
| pT1                          | 9                         |
| pT2                          | 12                        |
| pT3 + pT4                    | 4                         |
| <b>ER/PR</b>                 |                           |
| +                            | 13                        |
| –                            | 12                        |
| <b>Histology</b>             |                           |
| IDC                          | 22                        |
| ILC                          | 2                         |
| IDC + ILC                    | 1                         |
| <b>Lymph node metastasis</b> |                           |
| +                            | 14                        |
| –                            | 11                        |

**Figure S1.** VCAM-1 affects breast cancer cells proliferation and adhesion. (A) *VCAM-1* knockdown inhibits MDAMB231 cells proliferation *in vitro*. \*  $p < 0.01$ ; (B) Overexpression VCAM-1 enhances adhesion of NMuMG cells *in vitro*. \*  $p < 0.01$ ; (C) a,b, *VCAM-1* knockdown decreases MDAMB231 cells adhesive ability *in vitro*, \*  $p < 0.01$  and representative photos were taken under the light microscope (40×).

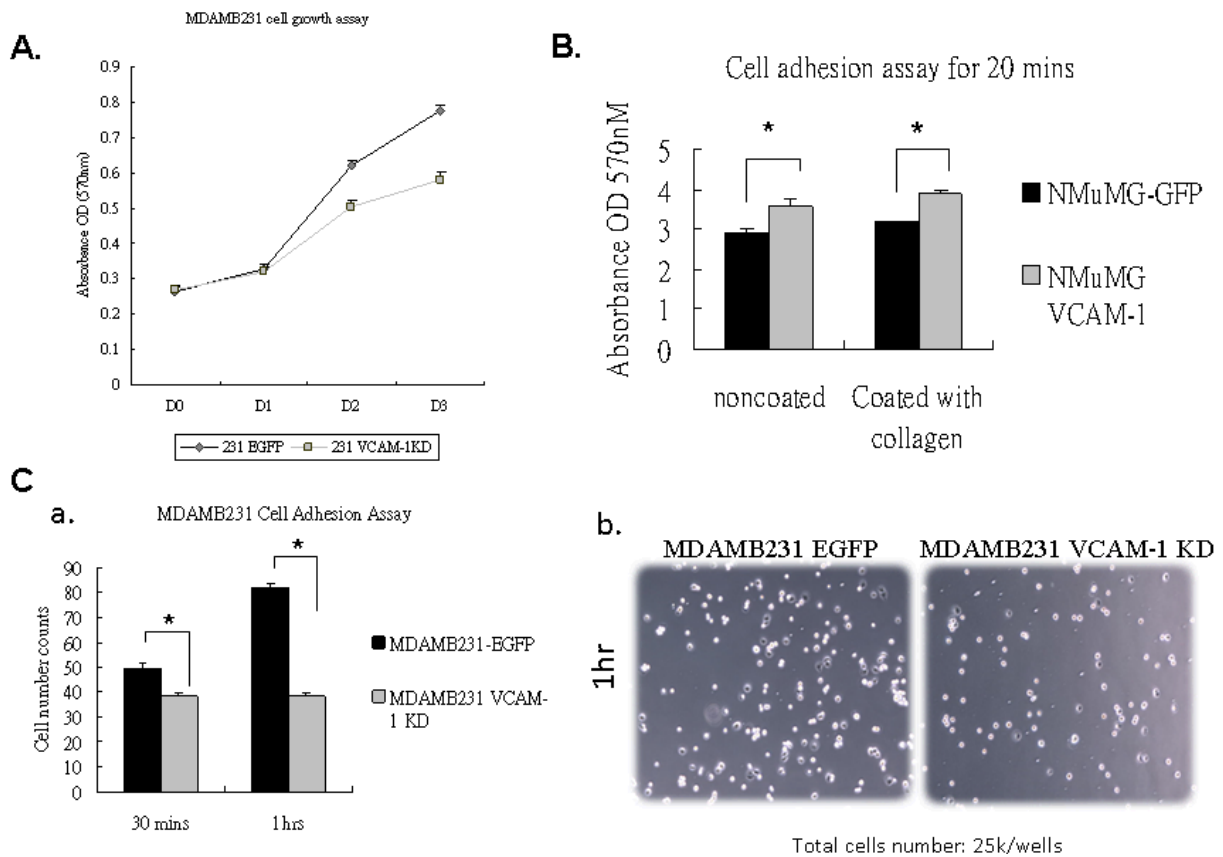

**Figure S2.** VCAM-1 modulates ABCG2 and CD44 promoter activity. Luciferase activity driven by the CD44 (-1262/+109) and ABCG2 promoters was compared between NMuMG VCAM-1 and NMuMG control cells. Firefly and Renilla luciferase activities were measured by the dual-luciferase reporter assay. To normalize the transfection efficiency, a fixed amount of pRL-CMV reporter, constitutively expressing the *R. reniformis* luciferase gene, was included in each sample. *Graphs* represent the mean of at least three independent experiments. Standard deviations are indicated. \*  $p < 0.05$ .

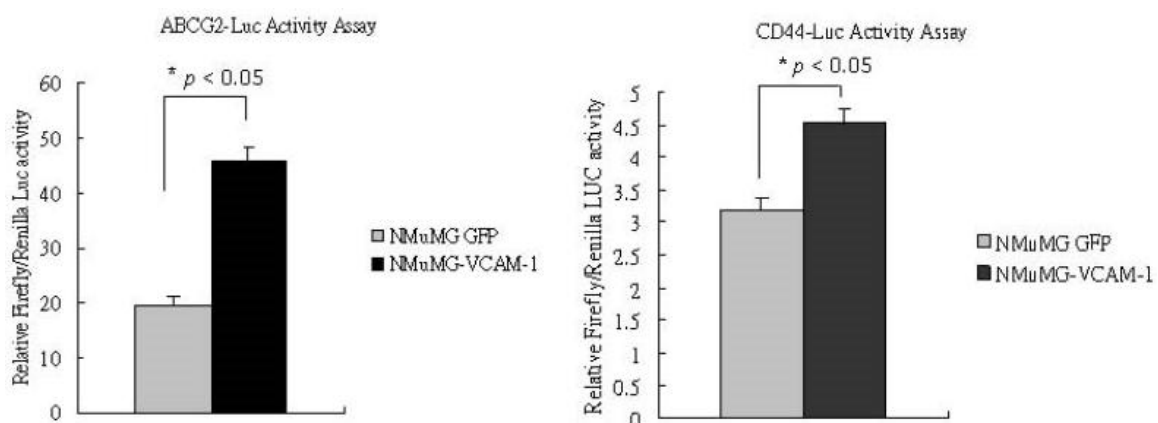

**Figure S3.** Knockdown of *VCAM-1* reduces CD44 and ABCG2 protein levels in MDAMB231 cells. Protein levels of VCAM-1, CD44, and ABCG2 in MDAMB231 and MDAMB231 shVCAM-1 cells were determined by Western blotting. Anti- $\beta$ -actin was used as a loading control.

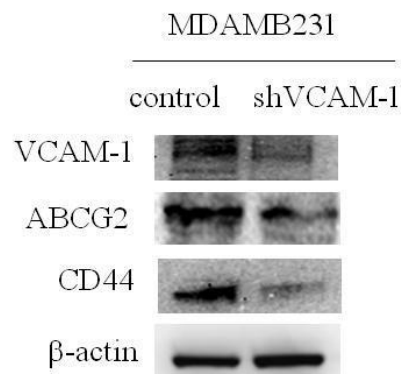

**Figure S4.** Schematic diagram of putative transcriptional factors binding sites in the VCAM-1 promoter. A plausible promoter region of 2.5 kb upstream to the VCAM-1 translation start site was obtained from UCSC genome database (<http://genome.ucsc.edu/>), and prediction of putative transcription factor binding sites was performed using MatInspector version 2.2 (<http://www.genomatix.de/products/MatInspector/>).

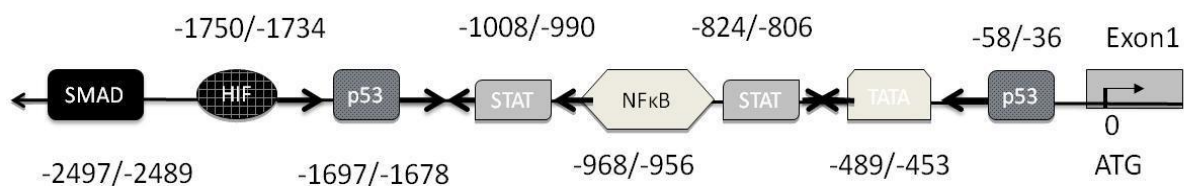

|           | <u>Matrix-matched sequence</u> |
|-----------|--------------------------------|
| SMAD:     | gGTCTtggc                      |
| TATA box: | gcttaTAAcaagtaac               |
| HIF:      | gacctgcaCGTGttaa               |
| P53:      | taaaCAAGtaaccagaggtcct         |
| NFkB:     | agtggttaTTCCg                  |
| STAT:     | ggttTCCCcttgaagggat            |
